# Supplementary material for: Metal–organic framework MIL-100(Fe) for the adsorption of malachite green from aqueous solution
Source: Royal Society of Chemistry journal article supplement (doi:10.1039/c2jm16513a), 2012-01-01
Supplement: c2jm16513a.pdf [file c2jm16513a.pdf]

## **Electronic Supplementary Information (ESI)**

### **Metal-Organic Framework MIL-100(Fe) for the Adsorption of Malachite Green from Aqueous Solution**

Shu-Hui Huo, and Xiu-Ping Yan\*

State Key Laboratory of Medicinal Chemical Biology, and Research Center for  
Analytical Sciences, College of Chemistry, Nankai University, Tianjin 300071,

China

**Preparation and Characterization of Adsorbents.** MIL-53 was synthesized according to Férey G. et al.<sup>S1</sup> Typically, 1300 mg of  $\text{Al}(\text{NO}_3)_3 \cdot 9\text{H}_2\text{O}$  and 288 mg of terephthalic acid were mixed with 5 mL of ultrapure water. The obtained mixture was transferred to a Teflon-lined bomb. Then, the Teflon-lined bomb was sealed, placed in an oven, and left at 220 °C for 3 days. The white crystalline solid was thus obtained. After washing with water, the solid was purified and activated upon heating in air at 330 °C for 3 days.

MIL-101 was synthesized according to Férey et al.<sup>S2</sup> Typically,  $\text{Cr}(\text{NO}_3)_3 \cdot 9\text{H}_2\text{O}$  (800 mg, 2.0 mmol), terephthalic acid (332 mg, 2.0 mmol) and HF (0.4 mL, 2.0 mmol) were mixed with ultrapure water (9.5 mL). The obtained mixture was transferred to a Teflon-lined bomb. Then, the Teflon-lined bomb was sealed, placed in an oven, and left at 200 °C for 8 h. The green crystalline solid was thus obtained. After thorough washing with DMF, the solid was emerged in ethanol in 1 h, and collected by centrifugation at 10000 rpm for 5 min. The procedure was repeated 3 times to eliminate the unreacted terephthalic acid from MIL-101. The solid was obtained by centrifugation at 10000 rpm for 5 min and then evacuated in vacuum under 150 °C for 12 h.

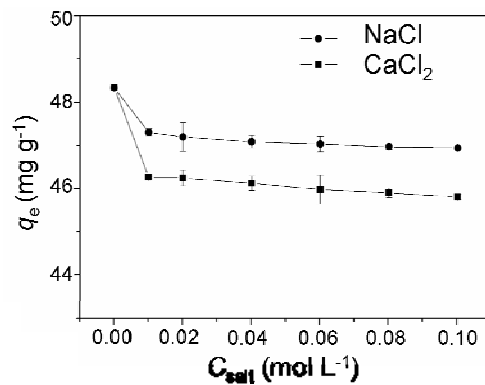

**Figure S1.** Effect of the concentration of NaCl and CaCl<sub>2</sub> on the adsorption of MG (100 mg L<sup>-1</sup>) on MIL-100 (10 mg L<sup>-1</sup>). Other conditions: temperature, 30 °C; pH 5.

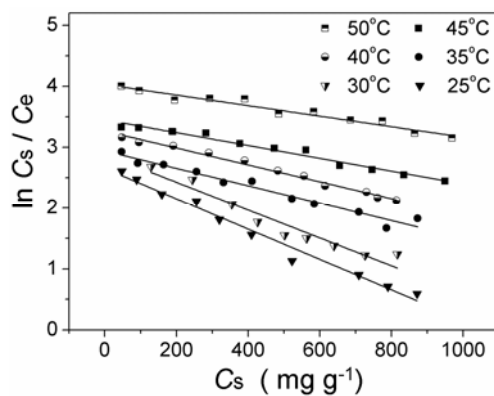

**Figure S2.** Plots of  $\ln(C_s/C_e)$  vs.  $C_s$  at various temperatures.

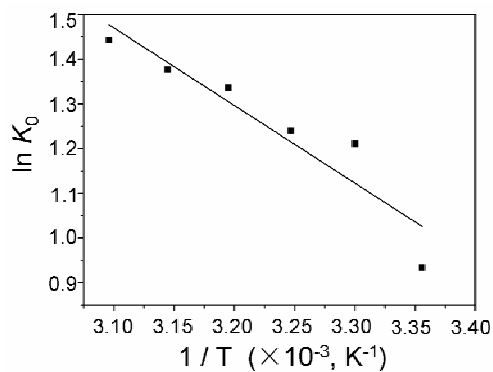

**Figure S3.** Plots  $\ln K_0$  against  $1/T$  for the adsorption of MG on MIL-100.

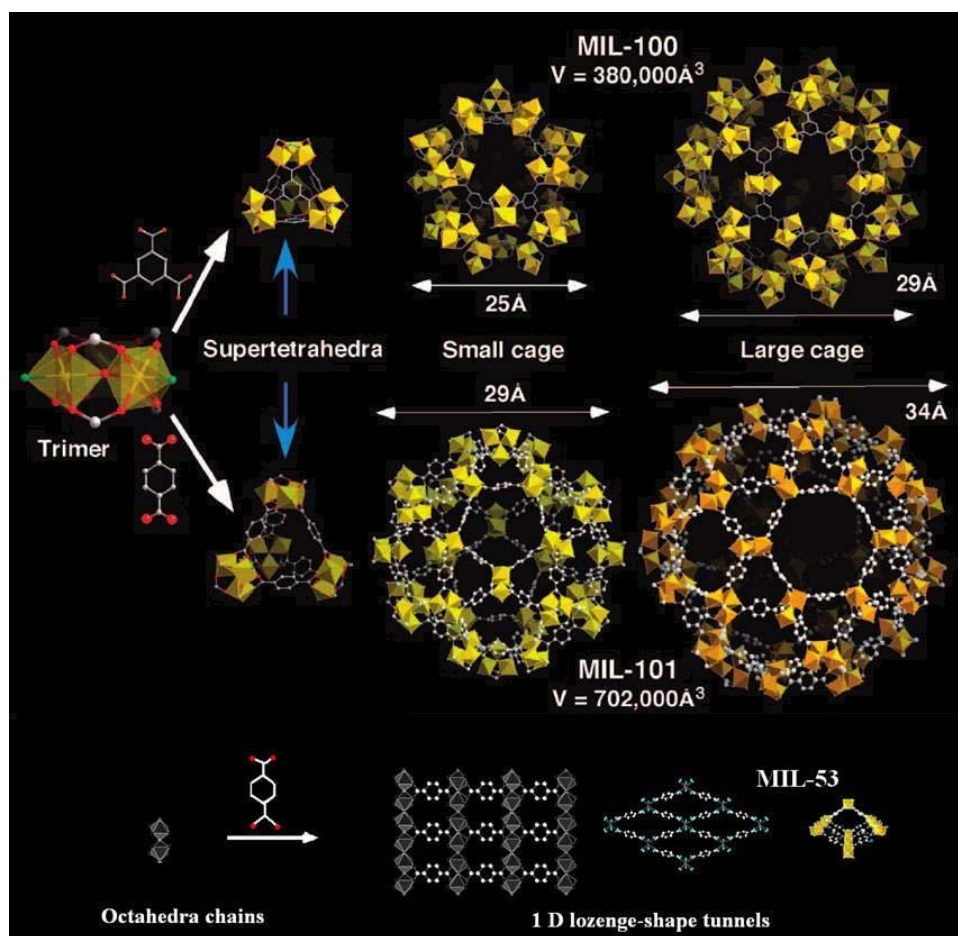

**Figure S4.** Structures of MIL-100, MIL-101 and MIL-53. This figure is a combination of Figure 1 in Ref.S3 with little modification. Copyright 2008 American Chemical Society and with permission.

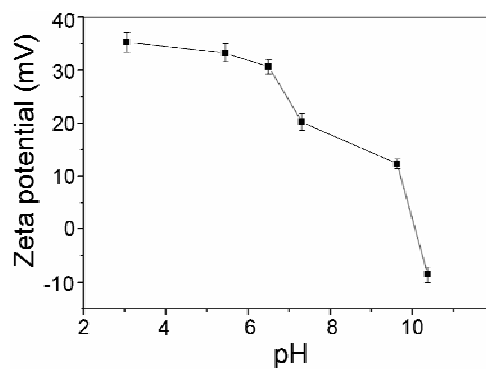

**Figure S5.** Effect of zeta potentials of MIL-101(Cr) ( $0.4 \text{ mg L}^{-1}$ ) with different pH.

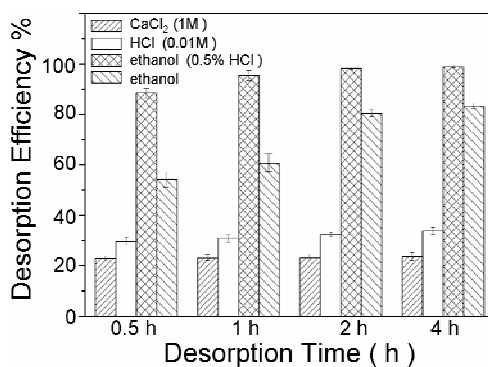

**Figure S6.** Effects of desorption solution and desorption time on desorption efficiency under ultrasonication.

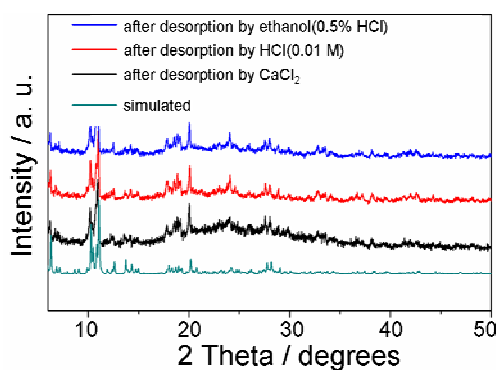

**Figure S7.** XRD patterns of MIL-100(Fe) after desorption used different solutions.

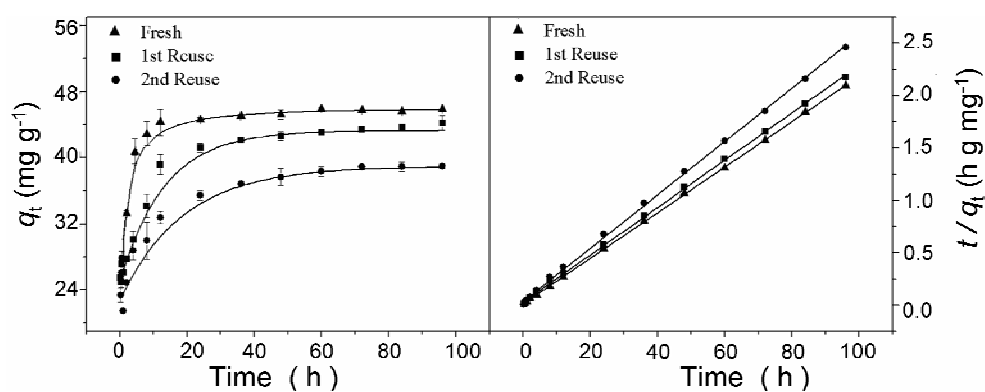

**Figure S8.** (a) Effect of contact time on the MG adsorption and (b) Pseudo-second-order plots to show the re-usability of a spent MIL-100.

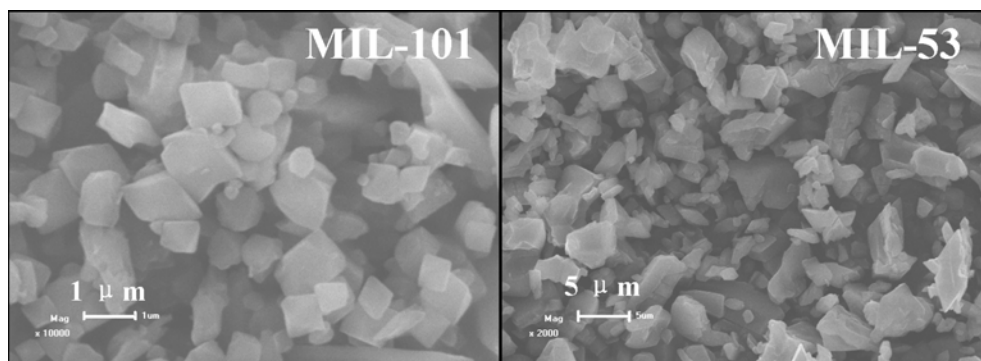

**Figure S9.** SEM images of the prepared MIL-101 and MIL-53.

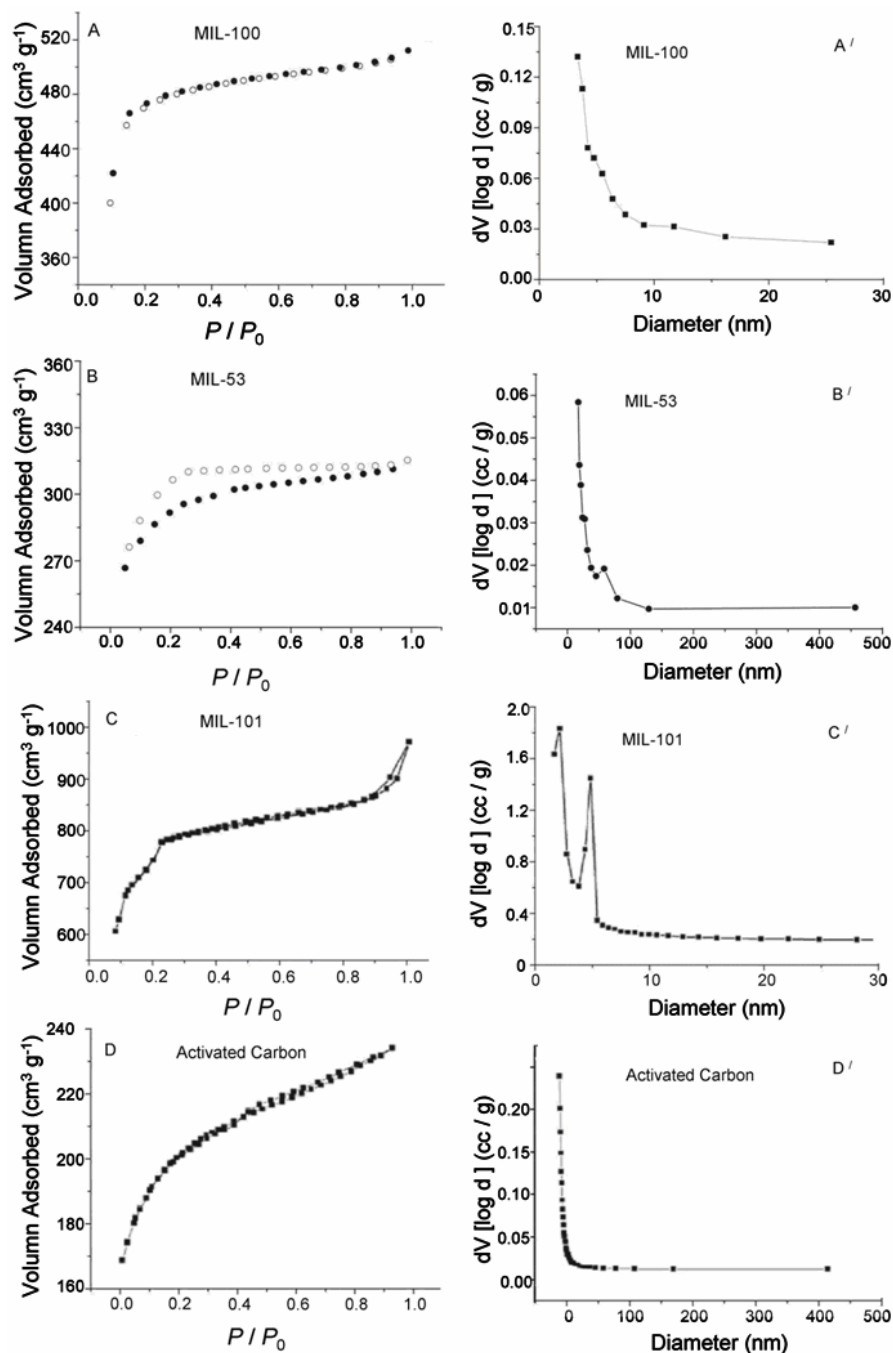

**Figure S10.** Adsorption-desorption isotherms (left) and  $\text{N}_2$  the pore size distribution (right) of MIL-100 (A) MIL-53 (B), MIL-101 (C) and activated carbon (D).

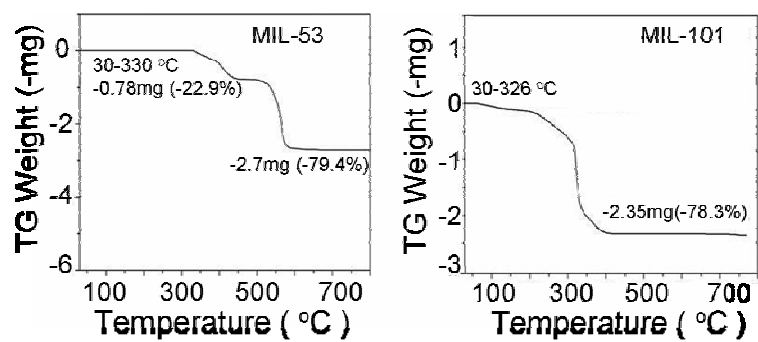

**Figure S11.** TGA curves of MIL-53 and MIL-101.



**Table S1 Molecular Properties and parameter for the MG**

| dye                        | planarity | molecular size<br>(Å×Å ×Å) | MW(g<br>mol <sup>-1</sup> ) | solubility<br>(g L <sup>-1</sup> ) | pKa <sup>S4,S5</sup> | λ <sub>UVmax</sub><br>(nm) |
|----------------------------|-----------|----------------------------|-----------------------------|------------------------------------|----------------------|----------------------------|
| Malachite green<br>oxalate | planar    | 13.8×9.9×4.2               | 927.03                      | 60 (20°C)                          | 10.3                 | 617nm                      |

**Table S2. Characteristic of the Adsorbents**

| adsorbents  | formula                                                              | BET surface<br>area (m <sup>2</sup> g <sup>-1</sup> ) | pore volume<br>(cm <sup>3</sup> g <sup>-1</sup> ) | pore/chan<br>nel<br>diameter<br>(Å) | open metal sites |
|-------------|----------------------------------------------------------------------|-------------------------------------------------------|---------------------------------------------------|-------------------------------------|------------------|
| MIL-100(Fe) | Fe <sub>3</sub> O(H <sub>2</sub> O) <sub>2</sub> F(BTC) <sub>2</sub> | 1626                                                  | 0.79                                              | 25, 29 <sup>S6</sup>                | Yes              |
| MIL-101(Cr) | Cr <sub>3</sub> O(H <sub>2</sub> O) <sub>2</sub> F(BDC) <sub>3</sub> | 2907                                                  | 1.50                                              | 29, 34 <sup>S2</sup>                | Yes              |
| MIL-53(Al)  | Al <sup>III</sup> (OH)(BDC)                                          | 1002                                                  | 0.03                                              | 8.5 <sup>S7</sup>                   | No               |
| AC          | C                                                                    | 600                                                   | 0.36                                              | -                                   | No               |

**Table S3. Comparison of Adsorption Capacities of Various Adsorbents for MG**

| adsorbent                          | q <sub>m</sub> (mg g <sup>-1</sup> ) | temperature (°C) | ref       |
|------------------------------------|--------------------------------------|------------------|-----------|
| MIL-100                            | 485                                  | 50               | this work |
| MIL-100                            | 266                                  | 30               | this work |
| MIL-53                             | 34.9                                 | 30               | this work |
| commercial powder activated carbon | 149                                  | 30               | this work |
| bamboo-based activated carbon      | 264                                  | 30               | S8        |
| cyclodextrin-based material        | 91.9                                 | 25               | S4        |
| oil palm trunk fiber               | 149                                  | 30               | S9        |
| natural zeolite                    | 24.5                                 | 25               | S10       |
| chitosan bead                      | 93.6                                 | 30               | S11       |
| chitosan bead                      | 82.2                                 | 50               | S11       |

## References

(S1) Loiseau, T.; Serre, C.; Huguenard, C.; Fink, G.; Taulelle, F.; Henry, M.;

Bataille, T.; Férey, G. *Chem. Eur. J.* **2004**, *10* (6), 1373-1382.

- (S2) Férey, G.; Mellot-Draznieks, C.; Serre, C.; Millange, F.; Dutour, J.; Surble, S.; Margiolaki, I. *Science* **2005**, *309* (5743), 2040-2042.
- (S3) Llewellyn, P. L.; Bourrelly, S.; Serre, C.; Vimont, A.; Daturi, M.; Hamon, L.; De Weireld, G.; Chang, J.-S.; Hong, D.-Y.; Kyu Hwang, Y.; Hwa Jung, S.; Férey, G. *Langmuir* **2008**, *24* (14), 7245-7250.
- (S4) Crini, G.; Peindy, H. N.; Gimbert, F.; Robert, C. *Sep. Purif. Technol.* **2007**, *53* (1), 97-110.
- (S5) Mall, I. D.; Srivastava, V. C.; Agarwal, N. K.; Mishra, I. M. *Colloids Surf. A: Physicochem. Eng. Aspects.* **2005**, *264* (1-3), 17-28.
- (S6) Latroche, M.; Surble, S.; Serre, C.; Mellot-Draznieks, C.; Llewellyn, P. L.; Lee, J. H.; Chang, J. S.; Jung, S. H.; Férey, G. *Angew. Chem. Int. Ed.* **2006**, *45* (48), 8227-8231.
- (S7) Alaerts, L.; Maes, M.; Giebeler, L.; Jacobs, P. A.; Martens, J. A.; Denayer, J. F. M.; Kirschhock, C. E. A.; De Vos, D. E. *J. Am. Chem. Soc.* **2008**, *130* (43), 14170-14178.
- (S8) Hameed, B. H.; El-Khaiary, M. I. *J. Hazard. Mater.* **2008**, *157* (2-3), 344-351.
- (S9) Hameed, B. H.; El-Khaiary, M. I. *J. Hazard. Mater.* **2008**, *154* (1-3), 237-244.
- (S10) Han, R. P.; Wang, Y.; Sun, Q.; Wang, L. L.; Song, J. Y.; He, X. T.; Dou, C. *C. J. Hazard. Mater.* **2010**, *175* (1-3), 1056-1061.

(S11) Yurdakoc, K.; Bekci, Z.; Ozveri, C.; Seki, Y. *J. Hazard. Mater.* **2008**, *154*  
(1-3), 254-261.
